# Supplementary material for: Enhanced p-cresol photodegradation over BiOBr/Bi2O3 in the presence of rhodamine B
Source: Royal Society of Chemistry journal article supplement (doi:10.1039/c6ra24852g), 2016-12-23
Supplement: c6ra24852g1.pdf [file c6ra24852g1.pdf]

## Supplementary Information

### Enhanced *p*-Cresol Photodegradation over BiOBr/Bi<sub>2</sub>O<sub>3</sub> in the Presence of Rhodamine B

Aijuan Han, Jiulong Sun, Gaik Khuan Chuah\* and Stephan Jaenicke\*

*Department of Chemistry, National University of Singapore, 3 Science Drive 3,  
Singapore 117543, Singapore*

*NUS Environmental Research Institute, National University of Singapore, 5A  
Engineering Drive 1, #02-01, Singapore 117411, Singapore*

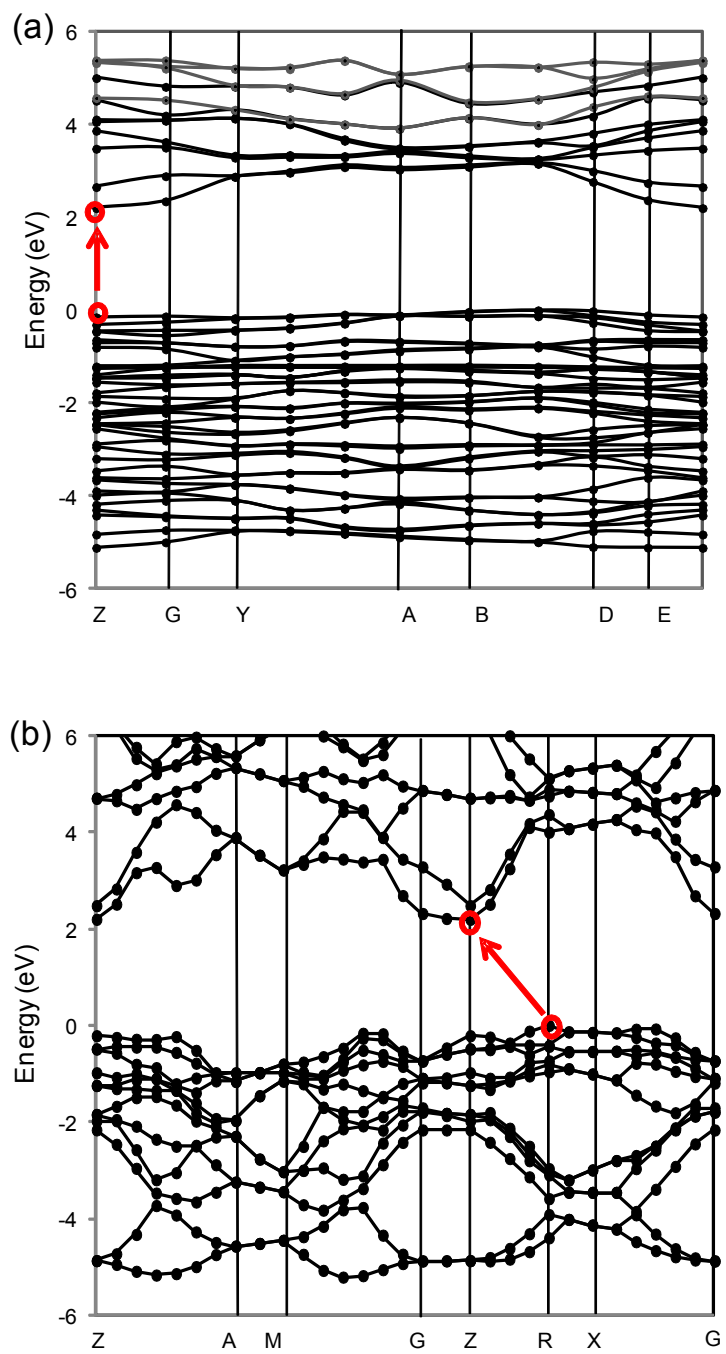

**Fig. S1.** Band structures of (a)  $\text{Bi}_2\text{O}_3$  and (b)  $\text{BiOBr}$ .

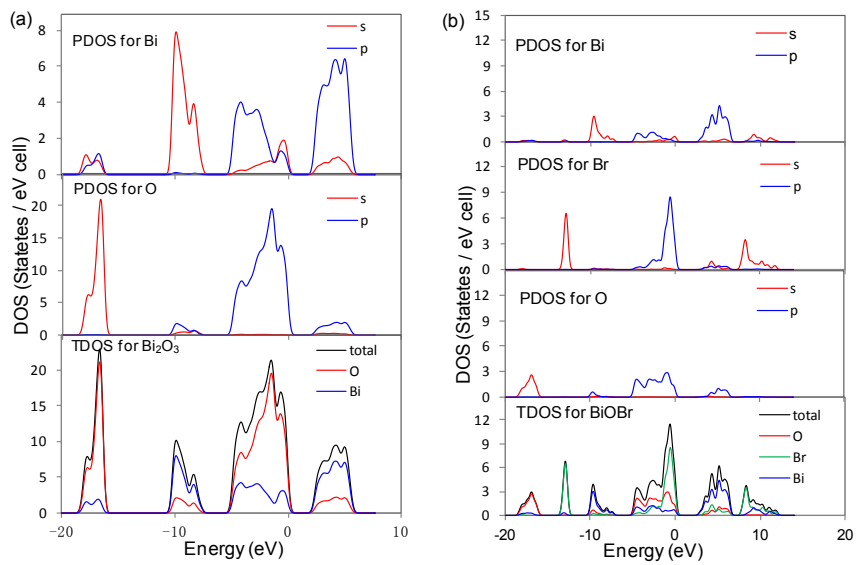

**Fig. S2.** Total and partial density of state of (a)  $\text{Bi}_2\text{O}_3$  and (b)  $\text{BiOBr}$  calculated using CASTEP program package.

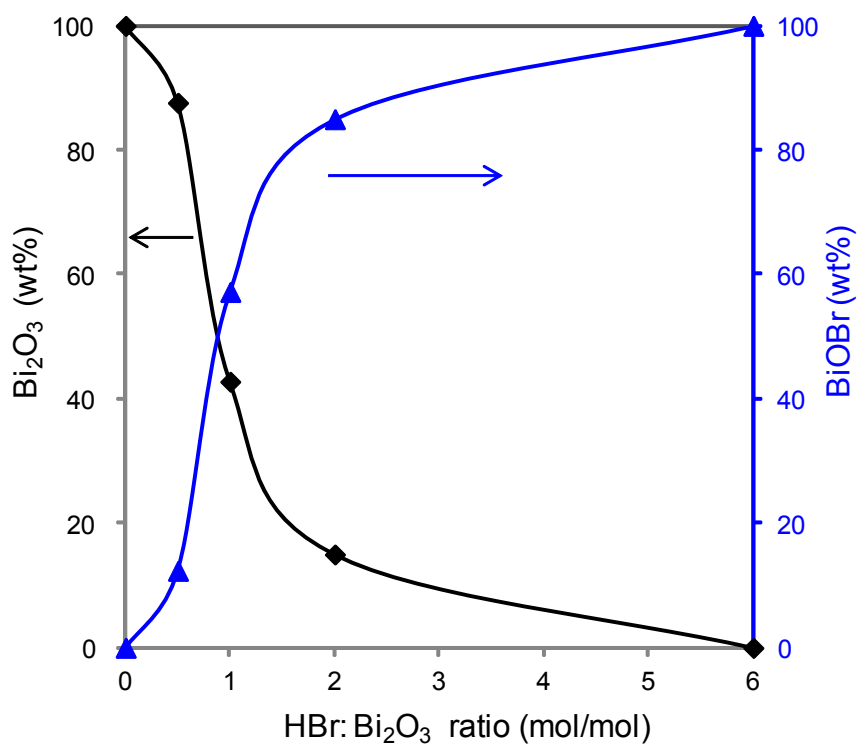

**Fig. S3.** Weight percentage of BiOBr and Bi<sub>2</sub>O<sub>3</sub> as a function of HBr:Bi<sub>2</sub>O<sub>3</sub> molar ratio.

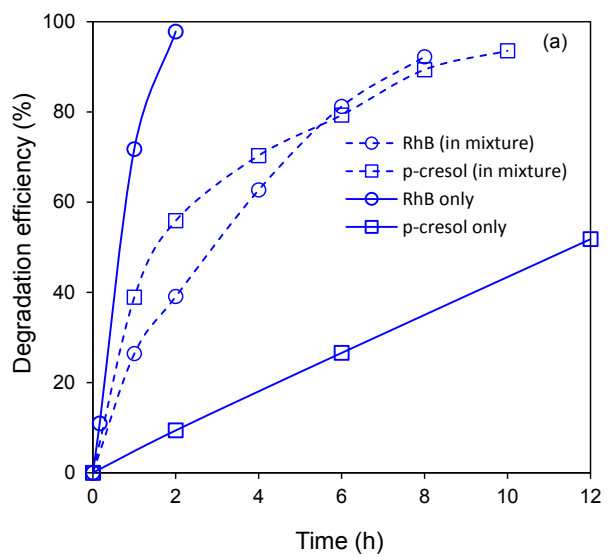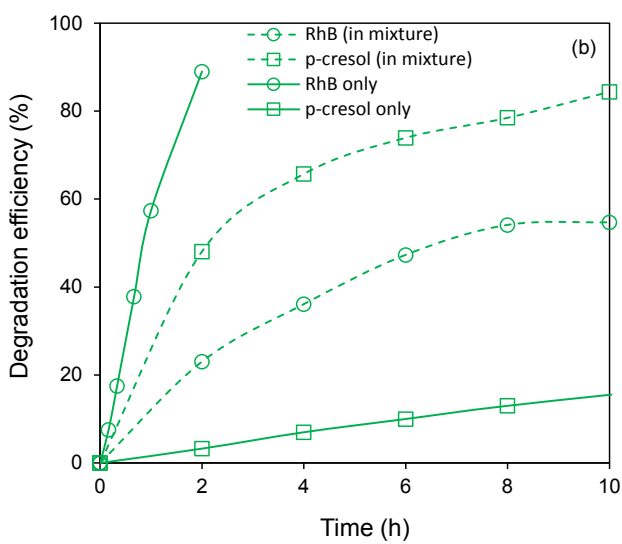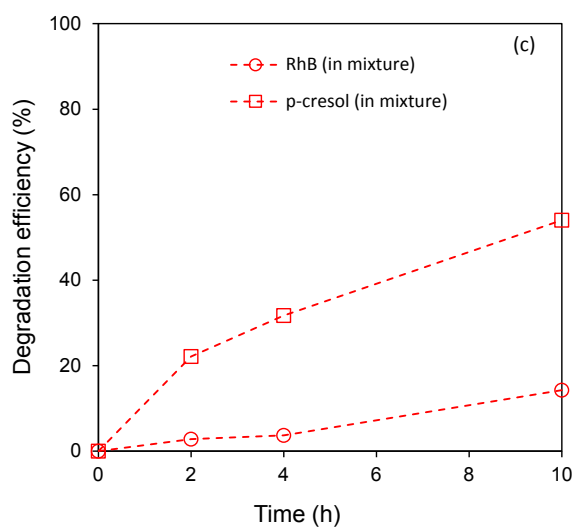

**Fig. S4.** Degradation of RhB and *p*-cresol singly and in mixtures under (a) blue and (b) green and (c) red LED light using 85% BiOBr/Bi<sub>2</sub>O<sub>3</sub> as catalyst.

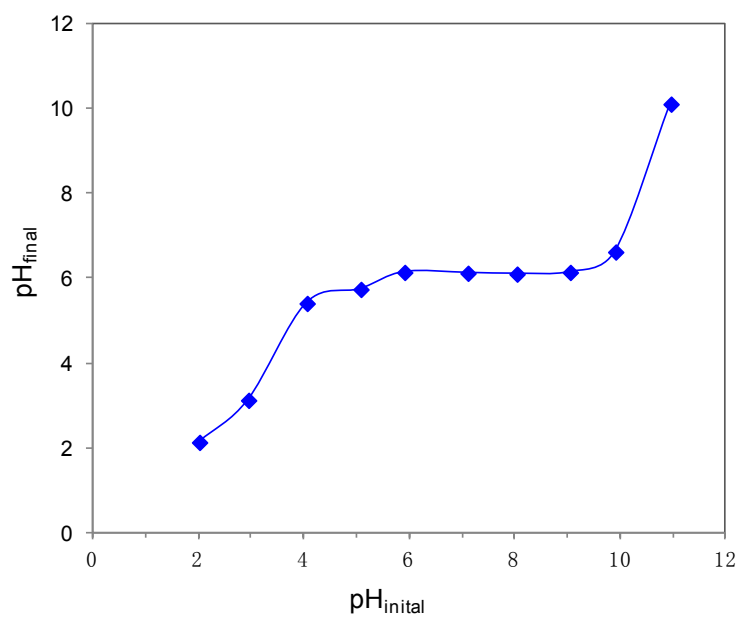

**Fig. S5.** Determination of pH at point of zero charge for 85% BiOBr/Bi<sub>2</sub>O<sub>3</sub> composite.

Procedure:

To find the pH at the point of zero charge (pH<sub>PZC</sub>), 0.01 g of the sample was placed in 10 ml of 0.1 M NaCl with the initial pH adjusted from 2.0 to 12.0 with either 0.1 mol/L HCl or NaOH. After equilibration, the final pH was determined and the pH<sub>PZC</sub> was obtained from the plateau in the plot of pH<sub>final</sub> versus pH<sub>initial</sub>.<sup>[S1]</sup>

[S1] L. Xiao, W. Ma, M. Han, Z. Cheng, J. Hazard. Mater. 186 (2011) 690-698.

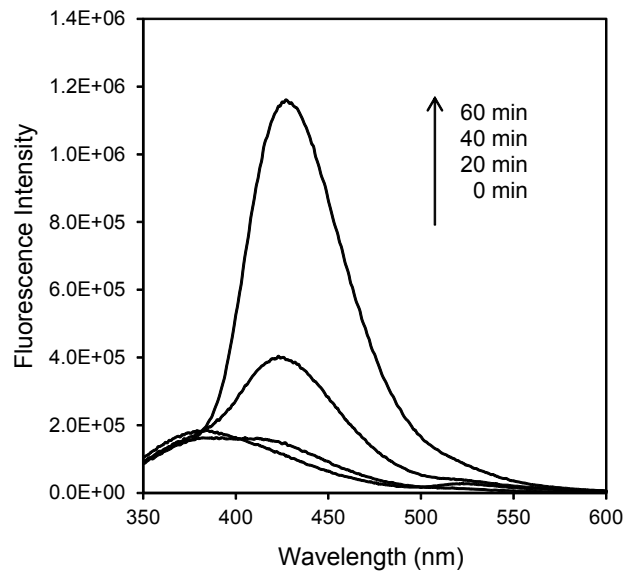

**Fig. S6.** Fluorescence spectrum of terephthalic acid solution under different illumination time in the presence of 85% BiOBr/Bi<sub>2</sub>O<sub>3</sub>.

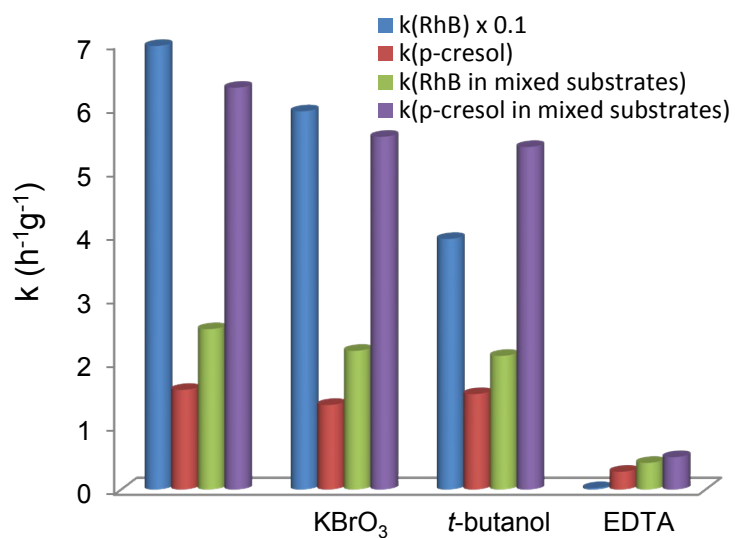

**Fig. S7.** Pseudo first-order rate constant for *p*-cresol and RhB with addition of KBrO<sub>3</sub>, *tert*-butanol, EDTA as scavengers for •O<sub>2</sub><sup>-</sup>, •OH, and holes, respectively. 21 μmol of the scavenger was added to 100 ml solutions containing 20 ppm RhB, 24 ppm *p*-cresol or mixtures of both under visible light irradiation. Photocatalyst: 85% BiOBr/Bi<sub>2</sub>O<sub>3</sub>.



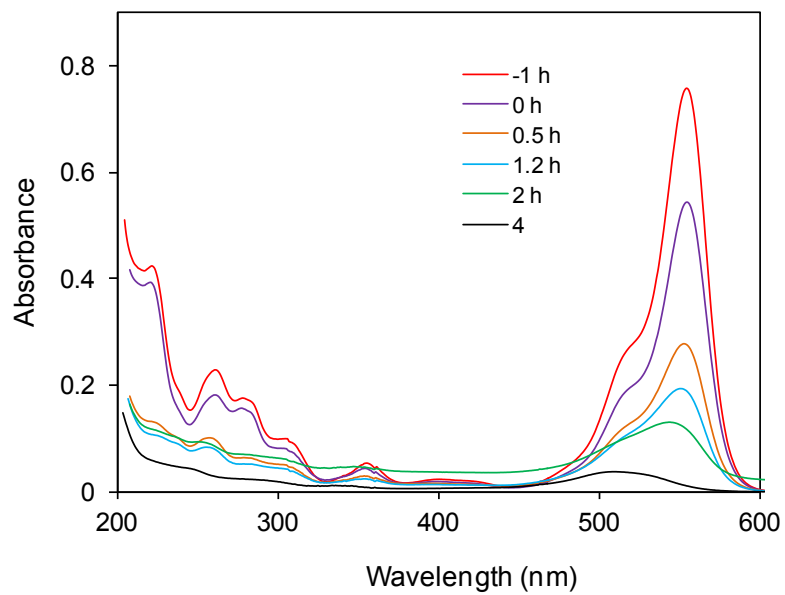

**Fig. S8.** UV-vis spectral changes of RhB in the presence of *p*-cresol and Fe<sup>3+</sup> as a function of reaction time under visible light irradiation.

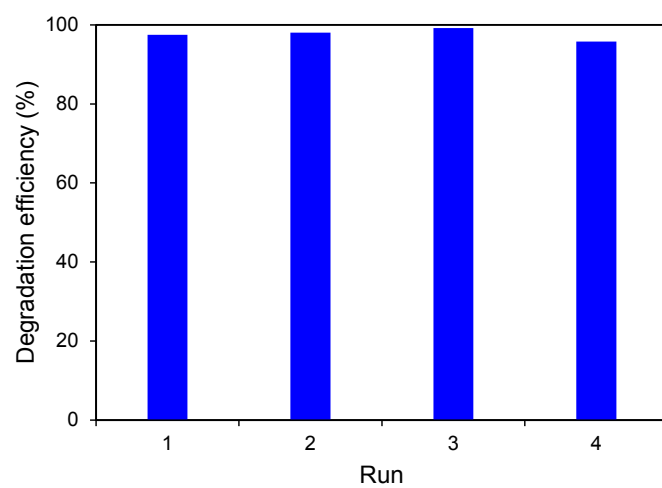

**Fig. S9(a)** Reuse of 85% BiOBr/Bi<sub>2</sub>O<sub>3</sub> in RhB degradation.

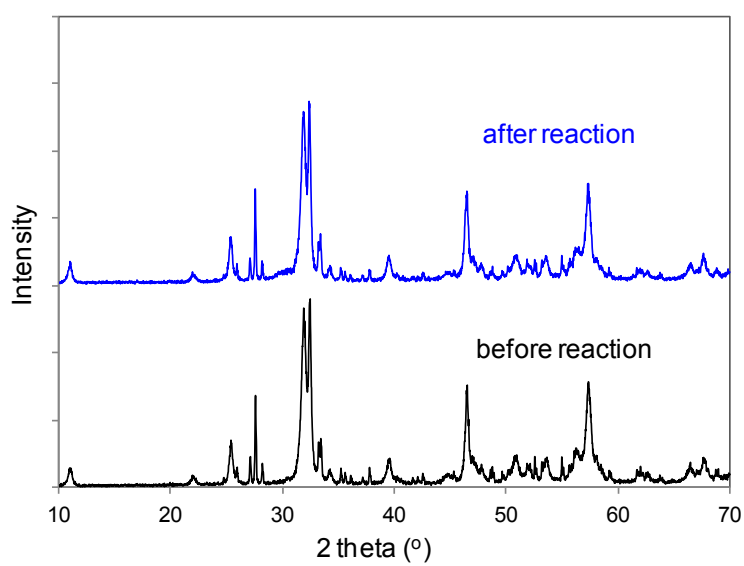

**Fig. S9(b)** XRD patterns of 85% BiOBr/Bi<sub>2</sub>O<sub>3</sub> before and after four runs.
